# Supplementary material for: High natural erosion rates are the backdrop for present-day soil erosion in the agricultural Middle Hills of Nepal
Source: Copernicus journal article supplement (doi:10.5194/esurf-3-363-2015), 2015-07-23

Supplementary data tables and figures for

**“High natural erosion rates are the backdrop for present-day soil erosion in the agricultural Middle Hills of Nepal ”**

by A. Joshua West, The ASTER Team, Mike Bickle, Tank Ojha

**Table S1.**  $^{10}\text{Be}_{\text{qtz}}$ -derived denudation rates from catchments in Nepal

| Sample                                                                               | Catchment area<br>(km <sup>2</sup> ) | Denudation rate<br>$\pm 1\sigma$ (mm/yr)            | Equivalent erosion flux*<br>$\pm 1\sigma$ (t.km <sup>-2</sup> .yr <sup>-1</sup> ) |
|--------------------------------------------------------------------------------------|--------------------------------------|-----------------------------------------------------|-----------------------------------------------------------------------------------|
| <i>From Wobus et al., 2005</i>                                                       |                                      |                                                     |                                                                                   |
| 01WBS1                                                                               | 10.5                                 | 0.18 $\pm$ 0.02                                     | 468 $\pm$ 52                                                                      |
| 03WBS2                                                                               | 3.9                                  | 0.19 $\pm$ 0.01                                     | 494 $\pm$ 26                                                                      |
| 01WBS3                                                                               | 16.7                                 | 0.19 $\pm$ 0.03                                     | 494 $\pm$ 78                                                                      |
| 01WBS2                                                                               | 22.4                                 | 0.19 $\pm$ 0.02                                     | 494 $\pm$ 52                                                                      |
| 01WBS5                                                                               | 3.4                                  | 0.19 $\pm$ 0.02                                     | 494 $\pm$ 52                                                                      |
| 01WBS6                                                                               | 18.4                                 | 0.37 $\pm$ 0.04                                     | 962 $\pm$ 104                                                                     |
| 01WBS7                                                                               | 17.5                                 | 0.48 $\pm$ 0.08                                     | 1248 $\pm$ 208                                                                    |
| 03WBS1                                                                               | 3.2                                  | 0.77 $\pm$ 0.10                                     | 2002 $\pm$ 260                                                                    |
| <i>Mean of Wobus Middle Hills catchments</i>                                         |                                      | <i>0.19<math>\pm</math>0.01</i>                     | <i>488<math>\pm</math>13</i>                                                      |
| <i>From Godard et al., 2014</i>                                                      |                                      |                                                     |                                                                                   |
| KP-160311-11                                                                         | 65.9                                 | 0.10 $\pm$ 0.01                                     | 260 $\pm$ 26                                                                      |
| KP-160311-12                                                                         | 42.5                                 | 0.10 $\pm$ 0.01                                     | 260 $\pm$ 26                                                                      |
| EK-180311-1                                                                          | 29.8                                 | 0.12 $\pm$ 0.01                                     | 312 $\pm$ 26                                                                      |
| EK-180311-2                                                                          | 87.1                                 | 0.12 $\pm$ 0.01                                     | 312 $\pm$ 26                                                                      |
| KP-160311-9                                                                          | 93.2                                 | 0.13 $\pm$ 0.01                                     | 338 $\pm$ 26                                                                      |
| KP-160311-10                                                                         | 97                                   | 0.14 $\pm$ 0.02                                     | 364 $\pm$ 52                                                                      |
| KP-090311-1                                                                          | 110.8                                | 0.19 $\pm$ 0.02                                     | 494 $\pm$ 52                                                                      |
| KP-090311-3                                                                          | 87.9                                 | 0.20 $\pm$ 0.02                                     | 520 $\pm$ 52                                                                      |
| KP-090311-2                                                                          | 11.9                                 | 0.21 $\pm$ 0.03                                     | 546 $\pm$ 78                                                                      |
| KP-090311-4                                                                          | 19.5                                 | 0.21 $\pm$ 0.03                                     | 546 $\pm$ 78                                                                      |
| TR-170311-4                                                                          | 86.2                                 | 0.22 $\pm$ 0.03                                     | 572 $\pm$ 78                                                                      |
| KP-090311-7                                                                          | 55.4                                 | 0.24 $\pm$ 0.04                                     | 624 $\pm$ 104                                                                     |
| PO-150311-5                                                                          | 90.7                                 | 0.26 $\pm$ 0.04                                     | 676 $\pm$ 104                                                                     |
| KP-090311-5                                                                          | 99.1                                 | 0.36 $\pm$ 0.06                                     | 936 $\pm$ 156                                                                     |
| KP-090311-6                                                                          | 46.3                                 | 0.49 $\pm$ 0.08                                     | 1274 $\pm$ 208                                                                    |
| KP-090311-8                                                                          | 26.6                                 | 0.49 $\pm$ 0.07                                     | 1274 $\pm$ 182                                                                    |
| TR-170311-1                                                                          | 67.4                                 | 0.52 $\pm$ 0.10                                     | 1352 $\pm$ 260                                                                    |
| PO-140311-1                                                                          | 42.5                                 | 0.63 $\pm$ 0.09                                     | 1638 $\pm$ 234                                                                    |
| EK-180311-3                                                                          | 40.8                                 | 0.71 $\pm$ 0.12                                     | 1846 $\pm$ 312                                                                    |
| PO-150311-3                                                                          | 30.1                                 | 0.78 $\pm$ 0.15                                     | 2028 $\pm$ 390                                                                    |
| TR-170311-2                                                                          | 54.1                                 | 0.85 $\pm$ 0.16                                     | 2210 $\pm$ 416                                                                    |
| PO-150311-2                                                                          | 41.5                                 | 0.88 $\pm$ 0.15                                     | 2288 $\pm$ 390                                                                    |
| EK-180311-4                                                                          | 40.8                                 | 1.05 $\pm$ 0.27                                     | 2730 $\pm$ 702                                                                    |
| TR-170311-3                                                                          | 146.8                                | 1.33 $\pm$ 0.22                                     | 3458 $\pm$ 572                                                                    |
| EK-180311-5                                                                          | 116.5                                | 1.81 $\pm$ 0.49                                     | 4706 $\pm$ 1274                                                                   |
| <i>Mean of Godard Middle Hills catchments</i>                                        |                                      | <i>0.22<math>\pm</math>0.12</i>                     | <i>582<math>\pm</math>323</i>                                                     |
| <b><i>Middle Hills Mean <math>\pm 1</math> std dev</i></b>                           |                                      | <b><i>0.22<math>\pm</math>0.11</i></b>              | <b><i>563<math>\pm</math>290</i></b>                                              |
| <b><i>Middle Hills Median <math>\pm 68\%</math> confidence</i></b>                   |                                      | <b><i>0.19<sup>+0.22</sup>/<sub>-0.07</sub></i></b> | <b><i>494<sup>+1059</sup>/<sub>-312</sub></i></b>                                 |
| <i>grey text: catchments outside of Middle Hills; not included in average values</i> |                                      |                                                     |                                                                                   |
| <i>*equivalent erosion flux calculated for density of 2.6 g/cm<sup>3</sup></i>       |                                      |                                                     |                                                                                   |

**Table S2.** Suspended sediment fluxes from catchments in Nepal

| Station ID                                                                                                     | River       | Station     | Catchment area (km <sup>2</sup> ) | Sediment yield <sup>1</sup> (t.km <sup>-2</sup> .yr <sup>-1</sup> ) | Sediment yield <sup>2</sup> (t.km <sup>-2</sup> .yr <sup>-1</sup> ) | Sediment yield <sup>3</sup> (t.km <sup>-2</sup> .yr <sup>-1</sup> ) |
|----------------------------------------------------------------------------------------------------------------|-------------|-------------|-----------------------------------|---------------------------------------------------------------------|---------------------------------------------------------------------|---------------------------------------------------------------------|
| 570                                                                                                            | Kulekhani   | Kulekhani   | 126                               | 173.5                                                               |                                                                     |                                                                     |
| 470                                                                                                            | Lothar      | Lothar      | 169                               | 3637                                                                |                                                                     |                                                                     |
| 170                                                                                                            | Surnagad    | Patan       | 188                               | 1200                                                                |                                                                     |                                                                     |
| 430                                                                                                            | Seti        | Pokhara     | 582                               | 5285.9                                                              |                                                                     |                                                                     |
| 550                                                                                                            | Bagmati     | Chobhar     | 585                               | 1476.8                                                              |                                                                     |                                                                     |
| 286                                                                                                            | Sarada      | Sarada      | 816                               | 507                                                                 | 371                                                                 |                                                                     |
| 795                                                                                                            | Kankaimai   | Mainachuli  | 1148                              | 4835.5                                                              | 1195                                                                |                                                                     |
| 598                                                                                                            | Kamala      | Kamala      | 1550                              | 323                                                                 |                                                                     |                                                                     |
| 0                                                                                                              | Bhote Kosi  |             | 2308                              | 130                                                                 |                                                                     |                                                                     |
| 590                                                                                                            | Bagmati     | Karmaiya    | 2720                              | 1476.8                                                              |                                                                     |                                                                     |
| 589                                                                                                            | Bagmati     |             | 2849                              |                                                                     | 1474                                                                |                                                                     |
| 290                                                                                                            | Babai       | Bargadha    | 3000                              | 3700                                                                |                                                                     |                                                                     |
| 350                                                                                                            | West Rapti  | Bayasoti    | 3512                              | 4730.6                                                              | 5016                                                                |                                                                     |
| 447                                                                                                            | Trisuli     | Betrawati   | 4640                              | 970.1                                                               | 542                                                                 |                                                                     |
| 360                                                                                                            | West Rapti  | Jalkundi    | 5150                              | 2795.6                                                              | 2540                                                                |                                                                     |
| 690                                                                                                            | Tamur       | Mulghat     | 5640                              | 10205.2                                                             |                                                                     |                                                                     |
| 410                                                                                                            | Kaligandaki | Setibeni    | 7130                              | 4172.8                                                              | 4449                                                                |                                                                     |
| 260                                                                                                            | Seti        | Banga       | 7460                              | 2801.8                                                              |                                                                     |                                                                     |
| 240                                                                                                            | Karnali     | Asarghat    | 19260                             | 862.1                                                               | 492                                                                 |                                                                     |
| 450                                                                                                            | Narayani    | Narayanghat | 31100                             | 5683.8                                                              | 3037                                                                |                                                                     |
| 280                                                                                                            | Karnali     | Chisapani   | 42890                             | 2010.5                                                              | 1651                                                                |                                                                     |
| 695                                                                                                            | Saptakosi   | Chatra      | 59400                             | 2440                                                                | 1161                                                                |                                                                     |
|                                                                                                                | Galaundi    |             |                                   |                                                                     |                                                                     | 518                                                                 |
|                                                                                                                | Pokhare     |             |                                   |                                                                     |                                                                     | 583                                                                 |
| <b>Middle Hills Mean <math>\pm</math> 1 std dev</b>                                                            |             |             |                                   |                                                                     |                                                                     | <b>1204<math>\pm</math>1120</b>                                     |
| <b>Middle Hills Median <math>\pm</math> 68% confidence</b>                                                     |             |             |                                   |                                                                     |                                                                     | <b>892<sup>+1074</sup>/<sub>-458</sub></b>                          |
| <i>grey text:</i> include significant area outside of Middle Hills; not included in averages                   |             |             |                                   |                                                                     |                                                                     |                                                                     |
| <sup>1</sup> sediment yields reported in Chalise and Khanal, 1997; this value for station 286 used in averages |             |             |                                   |                                                                     |                                                                     |                                                                     |
| <sup>2</sup> sediment yields calculated by Andermann et al., 2012                                              |             |             |                                   |                                                                     |                                                                     |                                                                     |
| <sup>3</sup> sediment yields reported by Bajracharya et al., 2004                                              |             |             |                                   |                                                                     |                                                                     |                                                                     |

**Figure S1.** Comparison of sediment fluxes for the same Nepal river gauging stations as calculated by Andermann et al. (2012) compared to Chalise and Khamal (1997). Reported fluxes are in close agreement for most stations but are significantly higher as reported by Chalise and Khamal for a few stations (see data in Table S2). Black line shows the 1:1 line; red dots are the reported fluxes in each study.

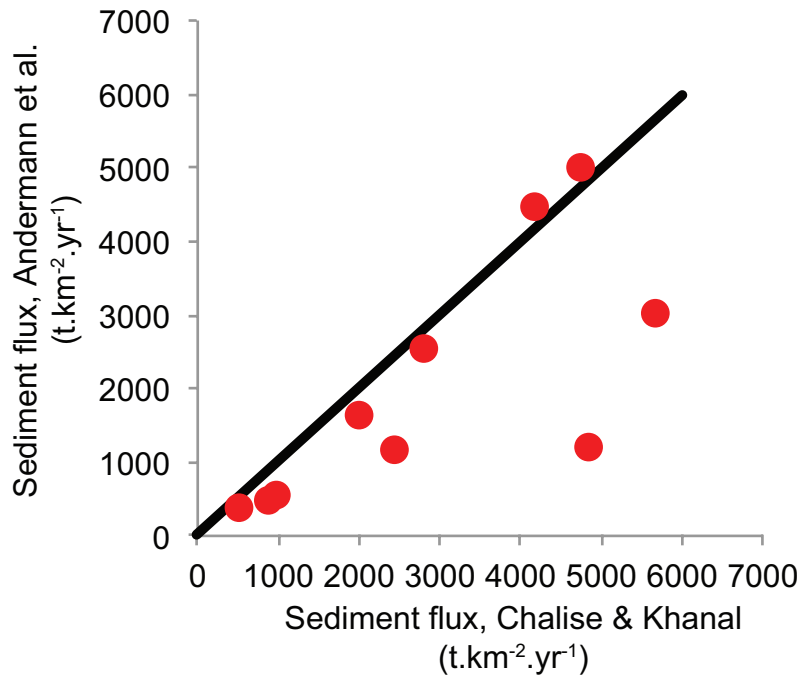

Supplement: Supplementary file 1 [file west_likhuerosion_supplementfigs.pdf › west_likhuerosion_supplementfigs.pdf]
