# Supplementary material for: High natural erosion rates are the backdrop for present-day soil erosion in the agricultural Middle Hills of Nepal
Source: Copernicus journal article supplement (doi:10.5194/esurf-3-363-2015), 2015-07-23
Supplement: Supplementary file 1 [file west_likhuerosion_supplementcompilation.xlsx]

## Sheet: Readme
This documents contains spreadsheets with the compiled literature data used for Figure 1 in
West et al., 2015, Earth Surface Dynamics:
High natural erosion rates are the backdrop for present-day soil erosion in the agricultural Middle Hills of Nepal
Data include both suspended sediment yields and Be-10 derived denudation rates for the Nepal Himalaya
Although this compilation was an effort to be as comprehensive as possible, it may not be absolutely complete

## Sheet: Wobus et al. 2005
Be-10 data and calculated denudations rates from Nepal Himalaya catchments
Wobus et al., 2005, Nature 434: 1008-1011
denudation rate data as reported in original paper (i.e., no relcalculation of production rates)
mass equivalent calculation using conversion based on density of 2.6 g/cm3
grain size not specified
lat/long coordinates apparently not reported in paper, so estimated from map in paper
Sample	estimated lat	estimated long	distance from MCT km	area km2	Be-10 10^3 at/g		1std	denudation mm/yr		1std	mass equivalent t/km2/yr		1std
01WBS5*	28.2054	84.8736	7.5	3.4	42.1	+/-	2.3	0.19	+/-	0.02	468	±	52
01WBS6*	28.138	84.8538	15	18.4	27.8	+/-	1.6	0.37	+/-	0.04	494	±	26
01WBS7*	28.0981	84.8351	19.5	17.5	13.9	+/-	1.7	0.48	+/-	0.08	494	±	78
03WBS1*	28.077	84.8262	22	3.2	6	+/-	0.5	0.77	+/-	0.1	494	±	52
03WBS2	28.0612	84.8638	12	3.9	27.9	+/-	0.9	0.19	+/-	0.01	494	±	52
01WBS3	27.948	84.7319	38.5	16.7	21.9	+/-	1.9	0.19	+/-	0.03	962	±	104
01WBS2	27.928	84.7303	41	22.4	23.4	+/-	1.8	0.19	+/-	0.02	1248	±	208
01WBS1	27.8813	84.7444	45.5	10.5	25.4	+/-	1.7	0.18	+/-	0.02	2002	±	260
* not used in calculating average value for Middle Hills as these are in the High Himalaya physiographically

## Sheet: Lupker et al. 2012
Be-10 data and calculated denudations rates from Nepal Himalaya catchments
Lupker et al., 2012, Earth and Planetary Science Letters 333-334: 146-156
Note: data from Indian basins and river basins outside of the Himalayan range not included
denudation rate data as reported in original paper (i.e., no relcalculation of production rates)
mass equivalent calculation using conversion based on density of 2.6 g/cm3
*grain size 250-400 microns; others all 125-250 microns
site ID	basin	river name	lat	long	Be-10 10^3 at/g		1std	denudation mm/yr		1std	mass equivalent t/km2/yr		1std
CA10-5	Karnali	Karnali MBT	28.784	81.574	48.3	±	8.7	0.6	±	0.1	1560	±	260
PB80	Karnali	Chisapani	28.639	81.283	9	±	0.9	2.4	±	0.6	6240	±	1560
LO743	Karnali	Khotiaghat	28.367	81.201	20.8	±	3.4	1	±	0.3	2600	±	780
LO741	Narayani	Narayanghat	27.703	84.427	13.2	±	1.1	1.3	±	0.4	3380	±	1040
CA10-10	Narayani	Narayanghat	27.703	84.427	10	±	1	1.7	±	0.6	4420	±	1560
LO1001	Narayani	Narayanghat	27.703	84.427	9	±	0.8	1.9	±	0.6	4940	±	1560
LO1001*	Narayani	Narayanghat	27.703	84.427	7.9	±	0.7	2.1	±	0.7	5460	±	1820
LO763	Kosi	Chatara	26.848	87.151	26.7	±	3.4	1	±	0.2	2600	±	520
CA987	Kosi	Chatara	26.848	87.151	54.4	±	2.9	0.5	±	0.1	1300	±	260
CA987*	Kosi	Chatara	26.848	87.151	29	±	3	0.9	±	0.2	2340	±	520

## Sheet: Godard et al. 2012
Be-10 data and calculated denudations rates from Nepal Himalaya catchments
Godard et al., 2012, J. Geophysical Res. - Earth Surf, 117: F03013
denudation rate data as reported in original paper (i.e., no relcalculation of production rates)
mass equivalent calculation using conversion based on density of 2.6 g/cm3
all from 250-1000 micron size fraction
sample ID	river	long	lat	Be-10 10^3 at/g		1std	denudation mm/yr		1std	mass equivalent t/km2/yr		1std
NIB-975-36	Marsyandi	84.5104	27.9128	11.87	±	0.72	1.5	±	0.2	3900	±	520
NIB-975-03	Marsyandi	84.3681	28.2909	10.41	±	0.73	2.6	±	0.3	6760	±	780
NIB-975-06	Marsyandi	84.4006	28.3216	11.34	±	0.68	2.5	±	0.3	6500	±	780
NIB-975-09	Marsyandi	84.3709	28.4611	14.72	±	1.71	2.1	±	0.3	5460	±	780
NIB-975-37	Darondi	84.5397	27.9066	7.95	±	0.44	1.1	±	0.1	2860	±	260
NIB-975-02	Khudi	84.355	28.2818	5.57	±	1.18	2.8	±	0.7	7280	±	1820
NIB-975-10	Dudh	84.3599	28.5289	8.86	±	0.68	3.1	±	0.4	8060	±	1040
NIB-975-04	Marsyandi	84.3968	28.3091	8.98	±	1.06	3	±	0.5	7800	±	1300
NIB-975-19	Marsyandi	84.3506	28.5306	7.64	±	0.77	4.4	±	0.6	11440	±	1560
NIB-975-20	Marsyandi	84.357	28.5208	7.76	±	0.81	4.1	±	0.6	10660	±	1560
NIB-975-21	Dona	84.3612	28.5173	38.29	±	3.14	0.8	±	0.1	2080	±	260
NIB-975-44	Dordi	84.4483	28.168	12.2	±	0.65	1.2	±	0.1	3120	±	260
NIB-975-52	Marsyandi	84.4751	28.0642	7.92	±	0.68	2.6	±	0.3	6760	±	780
NEP006	Marsyandi	84.5338	27.9042	9.54	±	1.03	1.9	±	0.3	4940	±	780
NEP065	Marsyandi	84.4295	27.9872	9.52	±	0.8	2	±	0.3	5200	±	780
NEP165	Marsyandi	84.4437	18.1036	6.15	±	0.77	3.4	±	0.6	8840	±	1560
NEP124	Marsyandi	84.4022	18.3875	8.33	±	0.8	3.5	±	0.5	9100	±	1300
NEP171	Marsyandi	84.3655	28.2616	7.66	±	0.53	3.3	±	0.4	8580	±	1040
NEP139	Marsyandi	84.2652	28.5523	19.12	±	2.14	1.9	±	0.3	4940	±	780
NEP140	Marsyandi	84.2559	28.5522	14.37	±	1.19	2.3	±	0.3	5980	±	780
NEP151	Marsyandi	84.145	28.6185	15.83	±	1.42	2.4	±	0.3	6240	±	780
NEP138	Nar	84.2591	28.5587	23.72	±	1.21	1.6	±	0.2	4160	±	520
NEP003	Darondi	84.5397	27.9066	9.13	±	0.54	1	±	0.1	2600	±	260
NEP030	Chudi	84.4188	27.9546	60.09	±	2.69	0.1	±	0	260	±	0
NEP080	Chepe	84.4842	18.0595	16.39	±	1.16	0.6	±	0.1	1560	±	260
NEP118	Nyadi	84.4068	28.3233	7.39	±	0.49	2.8	±	0.3	7280	±	780
NEP099	Paudi	84.4262	28.1131	16.74	±	0.79	0.3	±	0.1	780	±	260

## Sheet: Godard et al. 2014
Be-10 data and calculated denudations rates from Nepal Himalaya catchments
Godard et al., 2014, Geology 42: 243-246
denudation rate data as reported in original paper (i.e., no relcalculation of production rates)
mass equivalent calculation using conversion based on density of 2.6 g/cm3
all from 250-1000 micron size fraction
aample name	aample ID	long	lat	area km2	Be-10 10^3 at/g		1std	denudation mm/yr		1std	mass equivalent t/km2/yr		1std
KP-090311	1	85.0659	27.7469	110.8	41.91	±	2.89	0.19	±	0.02	260	±	26
KP-090311	2	84.9673	27.8074	11.9	25.09	±	2.47	0.21	±	0.03	260	±	26
KP-090311	3	84.9506	27.8113	87.9	35.01	±	2.4	0.2	±	0.02	312	±	26
KP-090311	4	84.8893	27.8054	19.5	27.1	±	2.39	0.21	±	0.03	312	±	26
KP-090311	5	84.8336	27.8031	99.1	17.14	±	2.36	0.36	±	0.06	338	±	26
KP-090311	6	84.7514	27.8012	46.3	10.63	±	1.49	0.49	±	0.08	364	±	52
KP-090311	7	84.6938	27.8045	55.4	24.96	±	3.28	0.24	±	0.04	494	±	52
KP-090311	8	84.6338	27.8716	26.6	11.1	±	1.17	0.49	±	0.07	520	±	52
KP-160311	9	84.0604	28.0669	93.2	41.61	±	2.63	0.13	±	0.01	546	±	78
KP-160311	10	84.0781	28.0129	97	38.68	±	2.6	0.14	±	0.02	546	±	78
KP-160311	11	84.2389	27.9887	65.9	44.02	±	2.31	0.1	±	0.01	572	±	78
KP-160311	12	84.2637	28.0291	42.5	47.81	±	3.41	0.1	±	0.01	624	±	104
PO-140311	1*	83.7725	28.311	42.5	22.4	±	2.23	0.63	±	0.09	676	±	104
PO-150311	2*	83.7355	28.2755	41.5	11.78	±	1.61	0.88	±	0.15	936	±	156
PO-150311	3*	83.7149	28.2318	30.1	10.48	±	1.67	0.78	±	0.15	1274	±	208
PO-150311	5	83.6132	28.2535	90.7	34.55	±	3.97	0.26	±	0.04	1274	±	182
TR-170311	1*	85.1358	27.9214	67.4	12.91	±	2.2	0.52	±	0.1	1352	±	260
TR-170311	2*	85.1907	27.9758	54.1	15.07	±	2.35	0.85	±	0.16	1638	±	234
TR-170311	3*	85.1756	27.9828	146.8	8.15	±	1.11	1.33	±	0.22	1846	±	312
TR-170311	4	85.1541	27.8657	86.2	29.14	±	2.68	0.22	±	0.03	2028	±	390
EK-180311	1	85.6173	27.6441	29.8	58.58	±	3	0.12	±	0.01	2210	±	416
EK-180311	2	85.7347	27.6773	87.1	64.59	±	2.89	0.12	±	0.01	2288	±	390
EK-180311	3*	85.8597	27.7532	40.8	12.84	±	1.8	0.71	±	0.12	2730	±	702
EK-180311	4*	85.8961	27.7783	40.8	11.92	±	2.87	1.05	±	0.27	3458	±	572
EK-180311	5*	85.9152	27.8819	116.5	10.12	±	2.54	1.81	±	0.49	4706	±	1274
* not used in calculating average value for Middle Hills as these are in the High Himalaya physiographically

## Sheet: Large River Sediment Yields
Sediment fluxes reported for large Himalaya river catchments of Nepal
from Andermann et al., 2012, Earth and Planetary Science Letters 351-352: 158-170
and Chalise and Khanal, 1997, FRIEND'97 - Regional Hydrology: Concepts and models for sustainable water resource management, IAHS Publ. no. 246
red are catchments identified as being predominantly Middle Hills based on elevation map
lat/long for sites reported in Chalise and Khanal, 1997 not reported, so estimated from map
sediment yield from Andermann et al., 2012 data calculated as total flux divided by total area
From Chalise and Khanal, 1997								From Andermann et al., 2012
station ID	river	station	est. long	est. lat	area km2	sediment yield t/km2/yr		long	lat	area km2	sed flux 10^6 t/yr	sed yield t/km2/yr
0	Bhote Kosi							85.26	27.75	2308	0.3	129.983
170	Surnagad	Patan	80.4171	29.3751	188	1200
240	Karnali	Asarghat	81.4182	29.0057	19260	862.1		81.44	28.95	21121	10.4	492.401
260	Seti	Banga	81.1425	28.9907	7460	2801.8
280	Karnali	Chisapani	81.2696	28.7435	42890	2010.5		81.29	28.64	45967	75.9	1651.18
286	Sarada	Sarada	82.1929	28.2904	816	507		82.02	27.64	808	0.3	371.287
290	Babai	Bargadha	81.4241	28.4527	3000	3700
350	West Rapti	Bayasoti	82.7863	28.0514	3512	4730.6		82.85	27.9	3648	18.3	5016.45
360	West Rapti	Jalkundi	82.2284	27.9464	5150	2795.6		82.23	27.95	5197	13.2	2539.93
410	Kaligandaki	Setibeni	83.5614	28.0421	7130	4172.8		83.6	28.01	7170	31.9	4449.09
430	Seti	Pokhara	84.0591	28.1442	582	5285.9
447	Trisuli	Betrawati	85.1546	27.9337	4640	970.1		85.18	27.97	4428	2.4	542.005
450	Narayani	Narayanghat	84.4272	27.7039	31100	5683.8		84.43	27.71	32002	97.2	3037.31
470	Lothar	Lothar	84.7938	27.5221	169	3637
550	Bagmati	Chobhar	85.2853	27.596	585	1476.8
570	Kulekhani	Kulekhani	85.2308	27.5455	126	173.5
589	Bagmati							85.48	27.11	2849	4.2	1474.2
590	Bagmati	Karmaiya	85.4977	27.1633	2720	1476.8
598	Kamala	Kamala	86.282	26.9532	1550	323
690	Tamur	Mulghat	87.2698	26.9221	5640	10205.2
695	Saptakosi	Chatra	87.1679	26.89	59400	2440		87.16	26.87	54024	62.7	1160.6
795	Kankaimai	Mainachuli	87.8783	26.6852	1148	4835.5		87.88	26.7	1172	1.4	1194.54

## Sheet: Gabet 2008 Sediment Yields
Sediment fluxes reported for catchments in the Marsyandi basin of Nepal
from Gabet et al., 2008, Earth and Planetary Science Letters 267: 482-494
lat/long not reported in the published paper but from personal communication with E. Gabet
erosion rate converted to mass flux based on density of 2600 g/cm3
Site No	Name	area km2	lat	long	erosion rate mm/yr	mass flux t/km2/yr	erosion rate range mm/yr
1	Koto	812	28.5534	84.2585	1	2600	0.7-1.3
2	Nar Khola	1052	28.5553	84.2594	0.1	260	0.1-0.2
3	Temang Khola	21	28.5231	84.3092	0.1	260	0.1-1.9
4	Danaque Khola	7	28.5304	84.3384	1	2600	0.0-1.9
5	Upper Dharapani	1946	28.526	84.3542	0.4	1040	0.4-0.4
6	Dudh Khola	491	28.528	84.3582	0.3	780	0.2-0.5
7	Dona Khola	89	28.5161	84.3592	0.4	1040	0.2-0.7
8	Lower Dharapani	2605	28.5109	84.3581	0.5	1300	0.4-0.5
9	Bhulbule	3217	28.2841	84.3614	0.5	1300	0.4-0.6
10	Khudi Khola	152	28.2798	84.3592	2	5200	1.5-3.0
