# Supplementary material for: High natural erosion rates are the backdrop for present-day soil erosion in the agricultural Middle Hills of Nepal
Source: Copernicus journal article supplement (doi:10.5194/esurf-3-363-2015), 2015-07-23
Supplement: Supplementary file [file esurf-3-363-2015-supplement-title-page.pdf › esurf-3-363-2015-supplement-title-page.pdf]

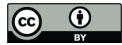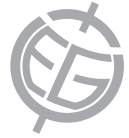

## *Supplement of*

# **High natural erosion rates are the backdrop for present-day soil erosion in the agricultural Middle Hills of Nepal**

**A. J. West et al.**

*Correspondence to:* A. J. West ([joshwest@usc.edu](mailto:joshwest@usc.edu))

- [esurf-3-363-2015-supplement-title-page.pdf](#)
- [west\\_likhuerosion\\_supplementcompilation.xlsx](#)
- [west\\_likhuerosion\\_supplementfigs.pdf](#)

The copyright of individual parts of the supplement might differ from the CC-BY 3.0 licence.
